# Supplementary material for: Treatment with Chemotherapy and Dendritic Cells Pulsed with Multiple Wilms' Tumor 1 (WT1)–Specific MHC Class I/II–Restricted Epitopes for Pancreatic Cancer
Source: Oxford University Press journal article supplement (doi:10.1158/1078-0432.ccr-14-0314), 2014-07-24
Supplement: 10780432ccr140314-sup-126105_2_supp_0_n7fhhf.xlsx [file 10780432ccr140314-sup-126105_2_supp_0_n7fhhf.xlsx]

## Sheet: Sheet1
Supplementary Table S3. Maximum of IFN-γ positive cells in CD4 or CD8 T cells by vaccinations
Patient	Vaccine	Maximum of IFN-γ positive cells in CD4 T cells (%) and vaccine times		Maximum of IFN-γ positive cells in CD8 T cells (%) and vaccine times
PDA-01	DC/WT1-I	0		0.2
		during entire periods		8 times
PDA-02	DC/WT1-I	0.44		3.69
		11 times		7 times
PDA-03	DC/WT1-II	0.72		0.07
		12 times		8 times
ICC-01	DC/WT1-I	0.32		10.95
		5 times		5 times
Mean ± S.E.		0.37 ± 0.15		3.73 ± 2.55
PDA-04	DC/WT1-I/II	2.83		5.23
		12 times		12 times
PDA-05	DC/WT1-I/II	1.3		1.9
		13 times		4 times
PDA-06	DC/WT1-I/II	0.99		0.03
		7 times		4 times
PDA-07	DC/WT1-I/II	0.04		0.07
		6 times		6 times
PDA-08	DC/WT1-I/II	5.04		4.74
		7 times		7 times
PDA-09	DC/WT1-I/II	1		0.96
		12 times		12 times
PDA-10	DC/WT1-I/II	2.92		3.61
		16 times		16 times
Mean ± S.E.		2.03± 0.64		2.55 ± 0.85
DC/WT1-I or -II vs. DC/WT1-I/II	P value	0.042		0.64
DC/WT1-I, dendritic cells pulsed with MHC class I restricted WT1 peptide; DC/WT1-II, dendritic cells pulsed with MHC class II restricted WT1 peptide; DC/WT1-I/II, dendritic cells pulsed with MHC class I and II restricted WT1 peptides
