# Supplementary material for: Treatment with Chemotherapy and Dendritic Cells Pulsed with Multiple Wilms' Tumor 1 (WT1)–Specific MHC Class I/II–Restricted Epitopes for Pancreatic Cancer
Source: Oxford University Press journal article supplement (doi:10.1158/1078-0432.ccr-14-0314), 2014-07-24
Supplement: 10780432ccr140314-sup-126105_2_supp_0_n7fnvn.xlsx [file 10780432ccr140314-sup-126105_2_supp_0_n7fnvn.xlsx]

## Sheet: Table 2
Supplementary Table S1. Adverse events during the first 3 courses of treatment
	DC/WT1-I or -II (n=4)					DC/WT1-I/II (n=7)
	Grade					Grade
	1	2	3	4		1	2	3	4
Hematological adverse events
Neutropenia		1	2				3	4
Leukocytopenia	1	2	1				3	4
Lymphopenia		3	1			1	5
Anemia	1	2	1			2	5
Thrombocytopenia			2			6	1
Non-hematological adverse events
Hyponatremia						2
Hyperkalemia						3	1
Hypokalemia						1
Hypoalbuminemia		1				1
ALT elevation	3					1		1
AST elevation	2	1				2
Bilirubin elevation						3	2
Hematuria						3
Proteinuria						2	1
Anorexia	1
Nausea		1
Injection site reaction	4					7
Adverse events were graded using the National Cancer Institute Common Toxicity Criteria of Adverse Events (CTCAE version 4.0). Data are n. ANC; absolute neutrophil count.
