# Supplementary material for: Treatment with Chemotherapy and Dendritic Cells Pulsed with Multiple Wilms' Tumor 1 (WT1)–Specific MHC Class I/II–Restricted Epitopes for Pancreatic Cancer
Source: Oxford University Press journal article supplement (doi:10.1158/1078-0432.ccr-14-0314), 2014-07-24
Supplement: 10780432ccr140314-sup-126105_2_supp_0_n7fsts.xlsx [file 10780432ccr140314-sup-126105_2_supp_0_n7fsts.xlsx]

## Sheet: Sheet1
Supplementary Table S2. Clinical efficacy results of patients with pancreatic ductal adenocarcinoma
Treatment		DC/WT1-I or -II (n = 3)		DC/WT1-I/II (n = 7)
DTH reactivity		negative		negative	weakly positive	strongly positive
Number of PDA patients		3 (100)		3 (42.9)	1 (14.3)	3 (42.9)
Best overall tumor response
Complete response (CR)		0 (0)		0 (0)	0 (0)	0 (0)
Partial response (PR)		0 (0)		0 (0)	0 (0)	0 (0)
Stable disease (SD)		1 (33.3)		2 (66.7)	1 (100)	3 (100)
Progressive disease (PD)		2 (66.7)		1 (33.3)	0 (0)	0 (0)
Disease Control Rate (%)		1 (33.3)		2 (66.7)	1 (100)	3 (100)
Overall Survival (OS)
Range (days)		175 - 288		133 - 283	325	582 - 717
Median OS (days)		206		215	N.D.	717
6-mo OS (%)		2 (66.7)		2 (66.7)	1 (100)	3 (100)
12-mo OS (%)		0 (0)		0 (0)	0 (0)	3 (100)
Progression free survival (PFS)
Range (days)		86 - 140		26 - 147	290	208 - 545
Median PFS (days)		107		109	N.D.	440
6-mo PFS (%)		0 (0)		0 (0)	1 (100)	3 (100)
12-mo PFS (%)		0 (0)		0 (0)	0 (0)	2 (66.7)
Data are n or median (days) or rate (%). Stable disease (SD) conformation is determined at least for more than 8 weeks. DC/WT1-I, dendritic cells pulsed with MHC class I restricted WT1 peptide; DC/WT1-II, dendritic cells pulsed with MHC class II restricted WT1 peptide; DC/WT1-I/II, dendritic cells pulsed with MHC class I and II restricted WT1 peptide; DTH, delayed-type hypersensitivity; weakly po…
